# Supplementary material for: Trends and Geographic Variabilities in Benzodiazepines Prescription in Primary Care to Older Adults: A 3-Year Population-Based Ecological Study in Portugal
Source: MDPI journal article supplement (doi:10.3390/healthcare10071342), 2022-07-19
Supplement: s1 [file s1]

**Supplementary Materials: Trends and Geographic Variabilities in Benzodiazepines Prescription in Primary Care to Older Adults: A 3-year Population-based Ecological Study in Portugal**

**Table S1:** Excluded benzodiazepines (N05BA and N05CD groups) with reasons (n=20).

| ATC Code | Benzodiazepine | Reason of exclusion                                                                                   |
|----------|----------------|-------------------------------------------------------------------------------------------------------|
| N05BA03  | Medazepam      | (a) BZD without Marketing Authorization (MA) or had lost MA in Portugal during the study period       |
| N05BA07  | Adinazolam     |                                                                                                       |
| N05BA13  | Halazepam      |                                                                                                       |
| N05BA14  | Pinazepam      |                                                                                                       |
| N05BA15  | Camazepam      |                                                                                                       |
| N05BA16  | Nordazepam     |                                                                                                       |
| N05BA17  | Fludiazepam    |                                                                                                       |
| N05BA19  | Etizolam       |                                                                                                       |
| N05BA21  | Clotiazepam    |                                                                                                       |
| N05BA23  | Tofizopam      |                                                                                                       |
| N05BA24  | Bentazepam     |                                                                                                       |
| N05CD02  | Nitrazepam     |                                                                                                       |
| N05CD03  | Flunitrazepam  |                                                                                                       |
| N05CD06  | Lormetazepam   |                                                                                                       |
| N05CD10  | Quazepam       |                                                                                                       |
| N05CD12  | Doxefazepam    |                                                                                                       |
| N05CD13  | Cinolazepam    |                                                                                                       |
| N05CD15  | Nimetazepam    |                                                                                                       |
| N05BA10  | Ketazolam      | (b) without a defined daily dose, accordingly to the SIM@SNS online platform and to the ATC/WHO Index |
| N05CD14  | Remimazolam    | (c) exclusively used in a hospital setting                                                            |

**Table S2:** Demographic data of study population in 2019.

| ARS/Sex/Age group | Male    |        | Female  |        | Total Male | Total Female | Total   |
|-------------------|---------|--------|---------|--------|------------|--------------|---------|
|                   | 65-74 y | ≥ 75 y | 65-74 y | ≥ 75 y |            |              |         |
| ARSN              | 192926  | 144787 | 233886  | 233514 | 337713     | 467400       | 805113  |
| ARSC              | 97257   | 86499  | 116017  | 139950 | 183756     | 255967       | 439723  |
| ARSLVT            | 179604  | 146041 | 225182  | 232645 | 325645     | 457827       | 783472  |
| ARSALE            | 25946   | 25437  | 29830   | 41220  | 51383      | 71050        | 122433  |
| ARSALG            | 22356   | 19261  | 25718   | 28718  | 41617      | 54436        | 96053   |
| Total             | 518089  | 422025 | 630633  | 676047 | 940114     | 1306680      | 2246794 |

**Table S3:** Demographic data of study population in 2020.

| ARS/Sex/Age group | Male    |        | Female  |        | Total Male | Total Female | Total   |
|-------------------|---------|--------|---------|--------|------------|--------------|---------|
|                   | 65-74 y | ≥ 75 y | 65-74 y | ≥ 75 y |            |              |         |
| ARSN              | 184555  | 136395 | 222341  | 217495 | 320950     | 439836       | 760786  |
| ARSC              | 101226  | 89265  | 120469  | 145101 | 190491     | 265570       | 456061  |
| ARSLVT            | 179663  | 149744 | 225566  | 237389 | 329407     | 462955       | 792362  |
| ARSALE            | 26182   | 25023  | 30011   | 40659  | 51205      | 70670        | 121875  |
| ARSALG            | 22488   | 19431  | 26097   | 28990  | 41919      | 55087        | 97006   |
| Total             | 514114  | 419858 | 624484  | 669634 | 933972     | 1294118      | 2228090 |

**Table S4:** Demographic data of study population in 2021.

| ARS/Sex/Age group | Male    | Female  | Total   |
|-------------------|---------|---------|---------|
|                   | ≥ 65 y  | ≥ 65 y  |         |
| ARSN              | 348774  | 459350  | 808124  |
| ARSC              | 216461  | 284064  | 500525  |
| ARSLVT            | 328745  | 456804  | 785549  |
| ARSALE            | 56085   | 73681   | 129766  |
| ARSALG            | 50932   | 60048   | 110980  |
| Total             | 1000997 | 1333947 | 2334944 |

**Table S5:** Female and Male Relation for every BZD, in every ARS, over the last 3 years  
(Intermediate Calculations).

|                              | <i>Mulheres</i> |         |          |          |           | <i>Homens</i> |         |          |          |          |
|------------------------------|-----------------|---------|----------|----------|-----------|---------------|---------|----------|----------|----------|
|                              | Alentejo        | Algarve | Norte    | Centro   | LVT       | Alentejo      | Algarve | Norte    | Centro   | LVT      |
| <i>Midazolam</i>             | 522680          | 226713  | 1083398  | 561606   | 1552419   | 182709        | 118774  | 532216   | 238398   | 646178   |
| <i>Temazepam</i>             | 82936           | 55916   | 201684   | 60648    | 456191    | 24836         | 18760   | 56154    | 21462    | 123438   |
| <i>Triazolam</i>             | 198740          | 136580  | 848760   | 240180   | 1079220   | 57260         | 60740   | 342140   | 102040   | 307400   |
| <i>Estazolam</i>             | 484111          | 195049  | 1971770  | 793193   | 2820675   | 157901        | 81229   | 866068   | 318659   | 1028151  |
| <i>Flurazepam</i>            | 189340          | 76893   | 1103591  | 304569   | 1033614   | 71828         | 45497   | 476762   | 138764   | 419926   |
| <i>Cloxazolam</i>            | 405190          | 164735  | 3578155  | 2017650  | 2391650   | 153930        | 65305   | 1464715  | 683345   | 908230   |
| <i>Ethyl Loflazepate</i>     | 1021940         | 760320  | 10224400 | 4282520  | 8619940   | 321660        | 233580  | 3828640  | 1457940  | 2870320  |
| <i>Alprazolam</i>            | 5704255         | 3016795 | 43277505 | 29277115 | 33944515  | 1738865       | 1219150 | 16509195 | 10427580 | 12011745 |
| <i>Clobazam</i>              | 122410          | 83695   | 1731785  | 544555   | 985195    | 49875         | 27535   | 795575   | 250490   | 414085   |
| <i>Bromazepam</i>            | 1156890         | 870312  | 8008239  | 3452202  | 8044782   | 366417        | 325449  | 2619726  | 1150407  | 2551647  |
| <i>Potassium Clozepamate</i> | 322690          | 156310  | 2124440  | 1368855  | 1754525   | 90720         | 61335   | 720745   | 445465   | 585185   |
| <i>Chlordiazepoxide</i>      | 2760            | 950     | 3993     | 633      | 2303      | 1000          | 290     | 2303     | 403      | 1163     |
| <i>Diazepam</i>              | 1927097         | 816383  | 11813788 | 8685364  | 12176502  | 793779        | 287032  | 4841784  | 3258322  | 4666546  |
| <i>Prazepam</i>              | 520             | 1880    | 23773    | 3313     | 5920      | 347           | 573     | 8553     | 1520     | 1140     |
| <i>Oxazepam</i>              | 98034           | 90060   | 1077177  | 1541994  | 688461    | 69126         | 70671   | 1606068  | 1341534  | 527391   |
| <i>Lorazepam</i>             | 3642170         | 2060188 | 47619206 | 23890720 | 23928480  | 1245136       | 805362  | 19788884 | 9189372  | 8591362  |
| <i>Cetazolam</i>             | 0               | 0       | 0        | 0        | 0         | 0             | 0       | 0        | 0        | 0        |
| <i>Brotizolam</i>            | 574728          | 273756  | 2462866  | 642292   | 2457266   | 197232        | 98812   | 1903930  | 254940   | 936922   |
| <i>Loprazolam</i>            | 331080          | 74430   | 1133280  | 304635   | 826725    | 112485        | 37740   | 518580   | 143205   | 309780   |
| <i>Mexazolam</i>             | 2431            | 2183    | 10415    | 8549     | 13707     | 766           | 729     | 3651     | 2715     | 4529     |
| <b>TOTAL</b>                 | 16790002        | 9063148 | 1.38E+08 | 77980593 | 102782090 | 5635872       | 3558563 | 56885689 | 29426561 | 36905138 |

**Table S6:** N05B and N05C National Percentage (%), over the last 3 years.

| Grupos ATC<br>3rd level | N05C     | N05B      |
|-------------------------|----------|-----------|
| Total 3 anos            | 35477073 | 441125565 |
| %                       | 7.4%     | 92.6%     |

**Table S7:** N05B-Top5 National Percentage (%), over the last 3 years.

|            | Alprazolam | Lorazepam | Diazepam | Ethyl Loflazepate | Bromazepam | TOTAL |
|------------|------------|-----------|----------|-------------------|------------|-------|
| Top 5      | N05BA12    | N05BA06   | N05BA01  | N05BA18           | N05BA08    |       |
| Total      | 157126720  | 140760880 | 49378727 | 33621260          | 28546071   |       |
| % do total | 33.0%      | 29.5%     | 10.4%    | 7.1%              | 6.0%       |       |

**Table S8:** Gender and Age Group differences in Alprazolam, Lorazepam, Diazepam, Ethyl Loflazepate and Bromazepam prescription according to each ARS and over the years.

| DDD/ 1000 inhabitants <sup>a</sup> /day<br>(DID) |                   | 2019   |       |       |      | 2020   |       |       |      | 2021*  |      | Δ 2019-2021 |      |
|--------------------------------------------------|-------------------|--------|-------|-------|------|--------|-------|-------|------|--------|------|-------------|------|
|                                                  |                   | Female |       | Male  |      | Female |       | Male  |      | Female | Male | Female      | Male |
|                                                  |                   | 65-74  | ≥ 75  | 65-74 | ≥ 75 | 65-74  | ≥ 75  | 65-74 | ≥ 75 |        |      |             |      |
| ARSN                                             | Alprazolam        | 83.7   | 73.7  | 41.1  | 41.8 | 94.3   | 85.4  | 46.2  | 49.2 | 91.8   | 45.8 | 86.7        | 44.9 |
|                                                  | Lorazepam         | 75.1   | 99.6  | 42.9  | 59.1 | 84.7   | 113.3 | 48.4  | 67.0 | 100.3  | 55.2 | 95.4        | 53.8 |
|                                                  | Diazepam          | 24.2   | 20.0  | 12.9  | 12.0 | 27.1   | 22.3  | 14.4  | 13.5 | 24.2   | 13.0 | 23.7        | 13.2 |
|                                                  | Ethyl Loflazepate | 25.0   | 17.2  | 12.2  | 9.6  | 19.7   | 13.6  | 9.8   | 7.8  | 23.5   | 11.1 | 20.5        | 10.4 |
|                                                  | Bromazepam        | 14.2   | 15.8  | 6.2   | 7.8  | 15.4   | 17.9  | 6.5   | 8.8  | 16.5   | 7.0  | 16.0        | 7.1  |
| ARSC                                             | Alprazolam        | 98.1   | 101.4 | 45.7  | 53.7 | 98.3   | 102.5 | 45.5  | 55.4 | 98.0   | 45.7 | 99.5        | 48.3 |
|                                                  | Lorazepam         | 68.0   | 91.6  | 34.7  | 52.5 | 68.2   | 92.8  | 36.3  | 52.9 | 81.0   | 40.9 | 81.2        | 42.6 |
|                                                  | Diazepam          | 34.1   | 28.1  | 16.2  | 15.6 | 32.6   | 28.2  | 16.1  | 15.5 | 27.7   | 13.8 | 29.5        | 15.1 |
|                                                  | Ethyl Loflazepate | 19.8   | 13.9  | 8.6   | 7.0  | 13.4   | 9.3   | 6.1   | 4.7  | 15.9   | 5.0  | 14.6        | 6.8  |
|                                                  | Bromazepam        | 10.2   | 13.4  | 4.5   | 6.7  | 10.0   | 13.5  | 4.4   | 6.9  | 11.4   | 7.0  | 11.7        | 5.3  |
| ARSLVT                                           | Alprazolam        | 61.2   | 66.3  | 29.0  | 34.4 | 64.6   | 69.0  | 31.3  | 36.9 | 71.7   | 34.9 | 67.5        | 33.4 |
|                                                  | Lorazepam         | 34.0   | 56.9  | 17.0  | 29.8 | 35.5   | 58.3  | 18.4  | 31.2 | 49.8   | 24.8 | 47.6        | 23.9 |
|                                                  | Diazepam          | 24.9   | 23.7  | 12.8  | 13.3 | 24.9   | 23.6  | 12.8  | 13.4 | 24.1   | 12.9 | 24.2        | 13.0 |
|                                                  | Ethyl Loflazepate | 20.1   | 15.7  | 9.0   | 7.6  | 15.0   | 11.1  | 6.6   | 5.9  | 20.6   | 9.4  | 17.1        | 8.0  |
|                                                  | Bromazepam        | 13.6   | 17.4  | 5.8   | 8.2  | 13.6   | 17.8  | 6.1   | 8.4  | 16.7   | 7.3  | 16.0        | 7.1  |
| ARSALE                                           | Alprazolam        | 68.9   | 70.8  | 25.5  | 33.0 | 72.8   | 75.2  | 27.4  | 33.9 | 73.3   | 30.2 | 72.5        | 30.0 |
|                                                  | Lorazepam         | 34.2   | 51.6  | 15.1  | 25.2 | 36.5   | 55.1  | 17.3  | 28.2 | 47.3   | 21.6 | 49.0        | 22.8 |
|                                                  | Diazepam          | 26.2   | 24.5  | 13.8  | 14.0 | 27.3   | 24.1  | 14.7  | 14.2 | 22.9   | 12.8 | 24.5        | 13.7 |
|                                                  | Ethyl Loflazepate | 17.4   | 11.7  | 6.3   | 5.9  | 12.1   | 7.5   | 4.2   | 4.3  | 15.4   | 6.3  | 13.0        | 5.6  |
|                                                  | Bromazepam        | 13.5   | 15.1  | 5.3   | 7.5  | 14.2   | 15.7  | 5.5   | 7.8  | 14.6   | 6.0  | 14.7        | 6.3  |
| ARSALG                                           | Alprazolam        | 47.2   | 48.0  | 23.6  | 25.1 | 51.2   | 49.8  | 25.8  | 28.3 | 48.1   | 23.5 | 48.7        | 24.8 |
|                                                  | Lorazepam         | 24.5   | 40.1  | 13.0  | 20.3 | 25.7   | 40.5  | 14.9  | 20.0 | 33.6   | 15.7 | 33.3        | 16.4 |
|                                                  | Diazepam          | 14.8   | 12.9  | 8.2   | 8.2  | 14.5   | 12.5  | 8.4   | 9.2  | 12.4   | 7.5  | 13.2        | 8.1  |
|                                                  | Ethyl Loflazepate | 15.5   | 11.7  | 5.5   | 4.9  | 11.0   | 7.7   | 4.5   | 3.6  | 13.9   | 5.0  | 12.3        | 4.8  |
|                                                  | Bromazepam        | 12.2   | 15.2  | 5.5   | 8.0  | 13.2   | 15.8  | 6.3   | 8.5  | 13.8   | 6.1  | 14.1        | 6.6  |

\* DID stratified by age was calculated only between 2019 and 2020 since official data for the older population in the year of 2021 are grouped only in “over 65 years”.

**Figure S1 A-E:** Distribution of ARS in relation to prescription (DID) of (A) Alprazolam, (B) Lorazepam, (C) Diazepam, (D) Ethyl Loflazepate and (E) Bromazepam.

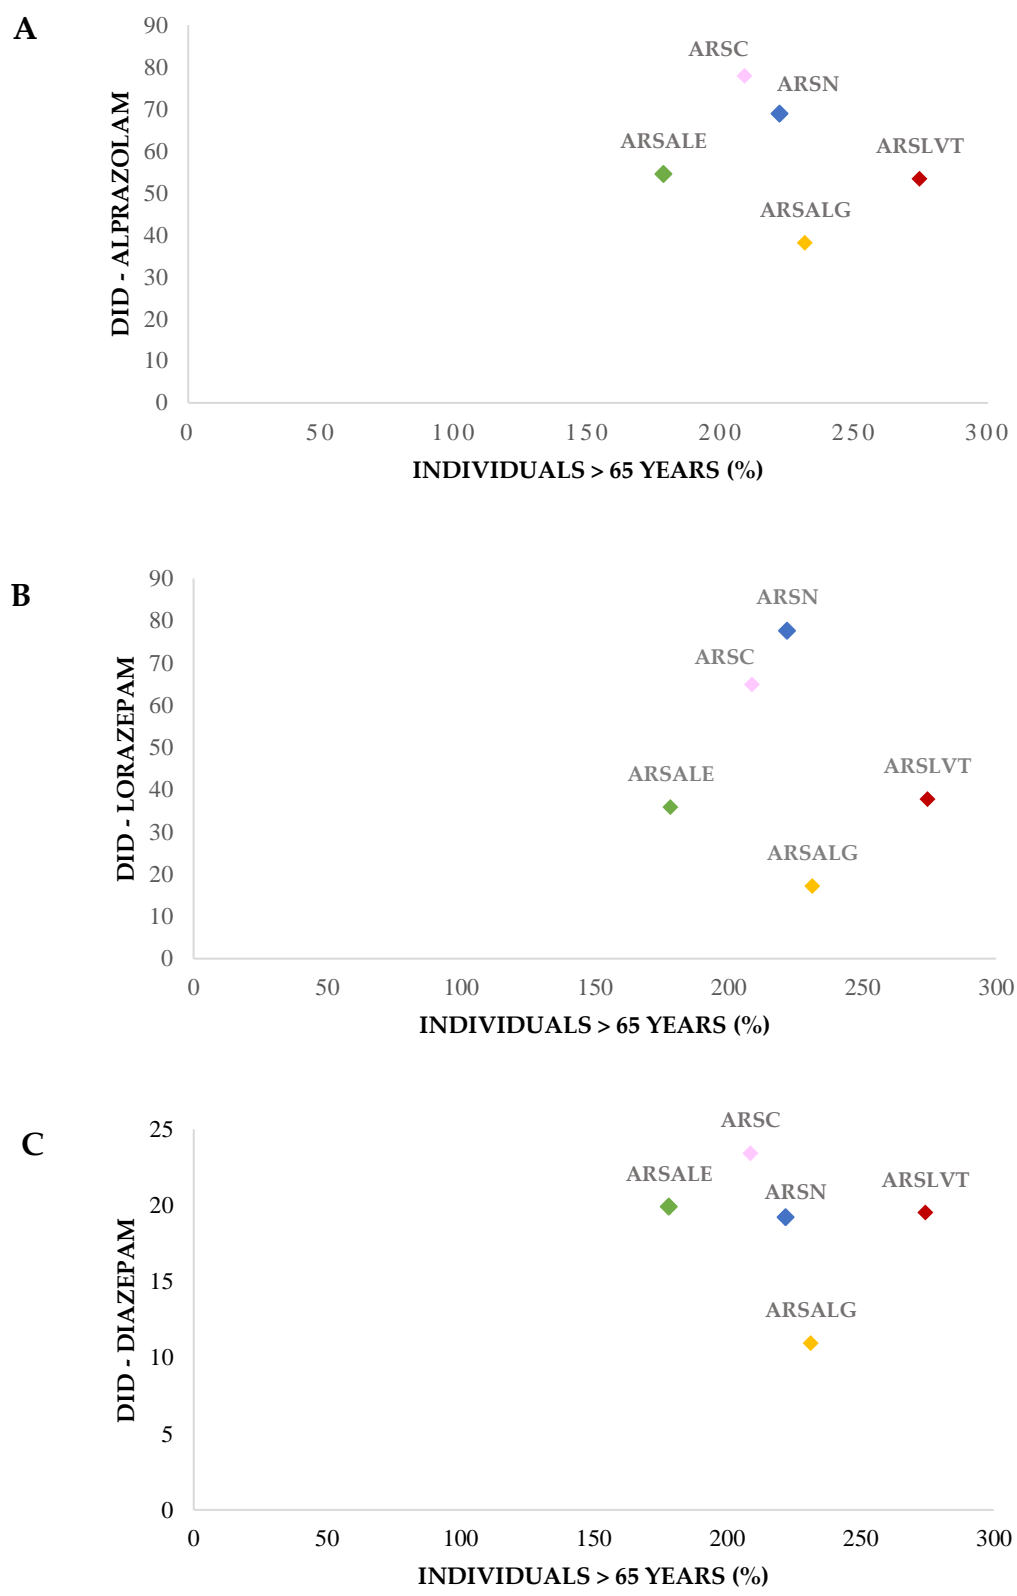

**D**

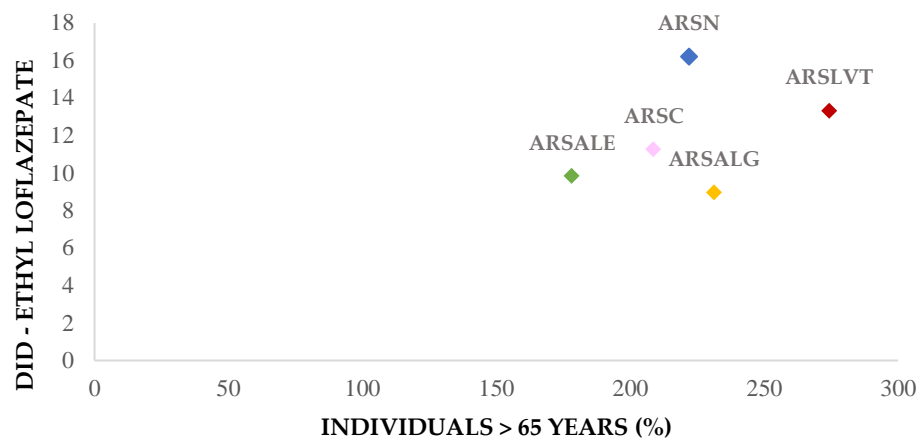

**E**

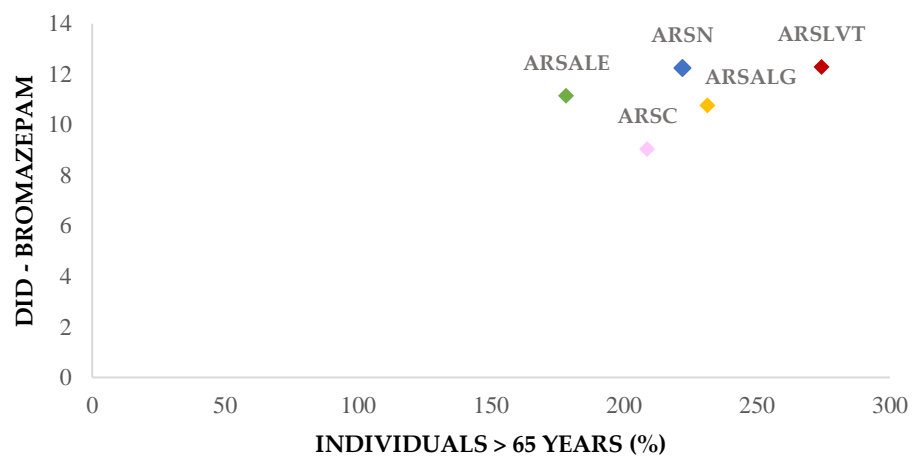

**Figure S2:** Portugal's Continental National Map divided by ARS

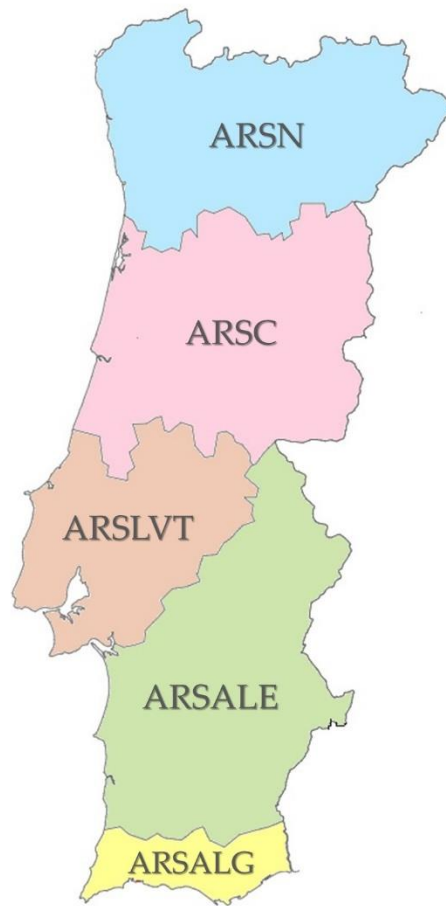

**Legend:**

**ARSN** – North Regional Health Administration (*Administração Regional de Saúde do Norte*)

**ARSC** – Center Regional Health Administration (*Administração Regional de Saúde do Centro*)

**ARSLVT** – Lisbon and Tagus Valley Regional Health Administration (*Administração Regional de Saúde de Lisboa e Vale do Tejo*)

**ARSALE** – Alentejo Regional Health Administration (*Administração Regional de Saúde do Alentejo*)

**ARSALG** – Algarve Regional Health Administration (*Administração Regional de Saúde do Algarve*)
